# Supplementary material
Source: publisher figshare collection journal article supplement (https://frontiersin.figshare.com/ndownloader/files/24980306)
Supplement: Supplementary file [file 24980306]

# SELF - DAS (ESCALA DE MEDICIÓN DE LA APATÍA)

## Instrucciones de Valoración

Utilice las instrucciones de valoración incluidas a continuación, sume los resultados totales para cada una de las distintas escalas.

## Instrucciones de Valoración

| Elemento con valoración positiva + |          | Elemento con valoración negativa - |          |
|------------------------------------|----------|------------------------------------|----------|
| ◇ Casi siempre                     | <b>0</b> | ◇ Casi siempre                     | <b>3</b> |
| ◇ A menudo                         | <b>1</b> | ◇ A menudo                         | <b>2</b> |
| ◇ A veces                          | <b>2</b> | ◇ A veces                          | <b>1</b> |
| ◇ Casi nunca                       | <b>3</b> | ◇ Casi nunca                       | <b>0</b> |

## Tabla de puntuación

| Escala Funciones Ejecutivas                                                                                                                                                                                                                                                                     | Escala Emocional | Escala inicio Cognitivo/Conductual |   |  |   |  |     |  |    |  |    |  |    |  |    |  |    |  |                                                                                                                                                                                                                                                                                                   |          |        |    |  |    |  |    |  |    |  |    |  |    |  |     |  |    |  |                                                                                                                                                                                                                                                                                                       |          |        |    |  |    |  |    |  |     |  |     |  |     |  |     |  |     |  |
|-------------------------------------------------------------------------------------------------------------------------------------------------------------------------------------------------------------------------------------------------------------------------------------------------|------------------|------------------------------------|---|--|---|--|-----|--|----|--|----|--|----|--|----|--|----|--|---------------------------------------------------------------------------------------------------------------------------------------------------------------------------------------------------------------------------------------------------------------------------------------------------|----------|--------|----|--|----|--|----|--|----|--|----|--|----|--|-----|--|----|--|-------------------------------------------------------------------------------------------------------------------------------------------------------------------------------------------------------------------------------------------------------------------------------------------------------|----------|--------|----|--|----|--|----|--|-----|--|-----|--|-----|--|-----|--|-----|--|
| <table><tr><th>Elemento</th><th>Puntos</th></tr><tr><td>1</td><td></td></tr><tr><td>6</td><td></td></tr><tr><td>10+</td><td></td></tr><tr><td>11</td><td></td></tr><tr><td>17</td><td></td></tr><tr><td>19</td><td></td></tr><tr><td>21</td><td></td></tr><tr><td>23</td><td></td></tr></table> | Elemento         | Puntos                             | 1 |  | 6 |  | 10+ |  | 11 |  | 17 |  | 19 |  | 21 |  | 23 |  | <table><tr><th>Elemento</th><th>Puntos</th></tr><tr><td>3+</td><td></td></tr><tr><td>5+</td><td></td></tr><tr><td>7+</td><td></td></tr><tr><td>9+</td><td></td></tr><tr><td>12</td><td></td></tr><tr><td>15</td><td></td></tr><tr><td>20+</td><td></td></tr><tr><td>24</td><td></td></tr></table> | Elemento | Puntos | 3+ |  | 5+ |  | 7+ |  | 9+ |  | 12 |  | 15 |  | 20+ |  | 24 |  | <table><tr><th>Elemento</th><th>Puntos</th></tr><tr><td>2+</td><td></td></tr><tr><td>4+</td><td></td></tr><tr><td>8+</td><td></td></tr><tr><td>13+</td><td></td></tr><tr><td>14+</td><td></td></tr><tr><td>16+</td><td></td></tr><tr><td>18+</td><td></td></tr><tr><td>22+</td><td></td></tr></table> | Elemento | Puntos | 2+ |  | 4+ |  | 8+ |  | 13+ |  | 14+ |  | 16+ |  | 18+ |  | 22+ |  |
| Elemento                                                                                                                                                                                                                                                                                        | Puntos           |                                    |   |  |   |  |     |  |    |  |    |  |    |  |    |  |    |  |                                                                                                                                                                                                                                                                                                   |          |        |    |  |    |  |    |  |    |  |    |  |    |  |     |  |    |  |                                                                                                                                                                                                                                                                                                       |          |        |    |  |    |  |    |  |     |  |     |  |     |  |     |  |     |  |
| 1                                                                                                                                                                                                                                                                                               |                  |                                    |   |  |   |  |     |  |    |  |    |  |    |  |    |  |    |  |                                                                                                                                                                                                                                                                                                   |          |        |    |  |    |  |    |  |    |  |    |  |    |  |     |  |    |  |                                                                                                                                                                                                                                                                                                       |          |        |    |  |    |  |    |  |     |  |     |  |     |  |     |  |     |  |
| 6                                                                                                                                                                                                                                                                                               |                  |                                    |   |  |   |  |     |  |    |  |    |  |    |  |    |  |    |  |                                                                                                                                                                                                                                                                                                   |          |        |    |  |    |  |    |  |    |  |    |  |    |  |     |  |    |  |                                                                                                                                                                                                                                                                                                       |          |        |    |  |    |  |    |  |     |  |     |  |     |  |     |  |     |  |
| 10+                                                                                                                                                                                                                                                                                             |                  |                                    |   |  |   |  |     |  |    |  |    |  |    |  |    |  |    |  |                                                                                                                                                                                                                                                                                                   |          |        |    |  |    |  |    |  |    |  |    |  |    |  |     |  |    |  |                                                                                                                                                                                                                                                                                                       |          |        |    |  |    |  |    |  |     |  |     |  |     |  |     |  |     |  |
| 11                                                                                                                                                                                                                                                                                              |                  |                                    |   |  |   |  |     |  |    |  |    |  |    |  |    |  |    |  |                                                                                                                                                                                                                                                                                                   |          |        |    |  |    |  |    |  |    |  |    |  |    |  |     |  |    |  |                                                                                                                                                                                                                                                                                                       |          |        |    |  |    |  |    |  |     |  |     |  |     |  |     |  |     |  |
| 17                                                                                                                                                                                                                                                                                              |                  |                                    |   |  |   |  |     |  |    |  |    |  |    |  |    |  |    |  |                                                                                                                                                                                                                                                                                                   |          |        |    |  |    |  |    |  |    |  |    |  |    |  |     |  |    |  |                                                                                                                                                                                                                                                                                                       |          |        |    |  |    |  |    |  |     |  |     |  |     |  |     |  |     |  |
| 19                                                                                                                                                                                                                                                                                              |                  |                                    |   |  |   |  |     |  |    |  |    |  |    |  |    |  |    |  |                                                                                                                                                                                                                                                                                                   |          |        |    |  |    |  |    |  |    |  |    |  |    |  |     |  |    |  |                                                                                                                                                                                                                                                                                                       |          |        |    |  |    |  |    |  |     |  |     |  |     |  |     |  |     |  |
| 21                                                                                                                                                                                                                                                                                              |                  |                                    |   |  |   |  |     |  |    |  |    |  |    |  |    |  |    |  |                                                                                                                                                                                                                                                                                                   |          |        |    |  |    |  |    |  |    |  |    |  |    |  |     |  |    |  |                                                                                                                                                                                                                                                                                                       |          |        |    |  |    |  |    |  |     |  |     |  |     |  |     |  |     |  |
| 23                                                                                                                                                                                                                                                                                              |                  |                                    |   |  |   |  |     |  |    |  |    |  |    |  |    |  |    |  |                                                                                                                                                                                                                                                                                                   |          |        |    |  |    |  |    |  |    |  |    |  |    |  |     |  |    |  |                                                                                                                                                                                                                                                                                                       |          |        |    |  |    |  |    |  |     |  |     |  |     |  |     |  |     |  |
| Elemento                                                                                                                                                                                                                                                                                        | Puntos           |                                    |   |  |   |  |     |  |    |  |    |  |    |  |    |  |    |  |                                                                                                                                                                                                                                                                                                   |          |        |    |  |    |  |    |  |    |  |    |  |    |  |     |  |    |  |                                                                                                                                                                                                                                                                                                       |          |        |    |  |    |  |    |  |     |  |     |  |     |  |     |  |     |  |
| 3+                                                                                                                                                                                                                                                                                              |                  |                                    |   |  |   |  |     |  |    |  |    |  |    |  |    |  |    |  |                                                                                                                                                                                                                                                                                                   |          |        |    |  |    |  |    |  |    |  |    |  |    |  |     |  |    |  |                                                                                                                                                                                                                                                                                                       |          |        |    |  |    |  |    |  |     |  |     |  |     |  |     |  |     |  |
| 5+                                                                                                                                                                                                                                                                                              |                  |                                    |   |  |   |  |     |  |    |  |    |  |    |  |    |  |    |  |                                                                                                                                                                                                                                                                                                   |          |        |    |  |    |  |    |  |    |  |    |  |    |  |     |  |    |  |                                                                                                                                                                                                                                                                                                       |          |        |    |  |    |  |    |  |     |  |     |  |     |  |     |  |     |  |
| 7+                                                                                                                                                                                                                                                                                              |                  |                                    |   |  |   |  |     |  |    |  |    |  |    |  |    |  |    |  |                                                                                                                                                                                                                                                                                                   |          |        |    |  |    |  |    |  |    |  |    |  |    |  |     |  |    |  |                                                                                                                                                                                                                                                                                                       |          |        |    |  |    |  |    |  |     |  |     |  |     |  |     |  |     |  |
| 9+                                                                                                                                                                                                                                                                                              |                  |                                    |   |  |   |  |     |  |    |  |    |  |    |  |    |  |    |  |                                                                                                                                                                                                                                                                                                   |          |        |    |  |    |  |    |  |    |  |    |  |    |  |     |  |    |  |                                                                                                                                                                                                                                                                                                       |          |        |    |  |    |  |    |  |     |  |     |  |     |  |     |  |     |  |
| 12                                                                                                                                                                                                                                                                                              |                  |                                    |   |  |   |  |     |  |    |  |    |  |    |  |    |  |    |  |                                                                                                                                                                                                                                                                                                   |          |        |    |  |    |  |    |  |    |  |    |  |    |  |     |  |    |  |                                                                                                                                                                                                                                                                                                       |          |        |    |  |    |  |    |  |     |  |     |  |     |  |     |  |     |  |
| 15                                                                                                                                                                                                                                                                                              |                  |                                    |   |  |   |  |     |  |    |  |    |  |    |  |    |  |    |  |                                                                                                                                                                                                                                                                                                   |          |        |    |  |    |  |    |  |    |  |    |  |    |  |     |  |    |  |                                                                                                                                                                                                                                                                                                       |          |        |    |  |    |  |    |  |     |  |     |  |     |  |     |  |     |  |
| 20+                                                                                                                                                                                                                                                                                             |                  |                                    |   |  |   |  |     |  |    |  |    |  |    |  |    |  |    |  |                                                                                                                                                                                                                                                                                                   |          |        |    |  |    |  |    |  |    |  |    |  |    |  |     |  |    |  |                                                                                                                                                                                                                                                                                                       |          |        |    |  |    |  |    |  |     |  |     |  |     |  |     |  |     |  |
| 24                                                                                                                                                                                                                                                                                              |                  |                                    |   |  |   |  |     |  |    |  |    |  |    |  |    |  |    |  |                                                                                                                                                                                                                                                                                                   |          |        |    |  |    |  |    |  |    |  |    |  |    |  |     |  |    |  |                                                                                                                                                                                                                                                                                                       |          |        |    |  |    |  |    |  |     |  |     |  |     |  |     |  |     |  |
| Elemento                                                                                                                                                                                                                                                                                        | Puntos           |                                    |   |  |   |  |     |  |    |  |    |  |    |  |    |  |    |  |                                                                                                                                                                                                                                                                                                   |          |        |    |  |    |  |    |  |    |  |    |  |    |  |     |  |    |  |                                                                                                                                                                                                                                                                                                       |          |        |    |  |    |  |    |  |     |  |     |  |     |  |     |  |     |  |
| 2+                                                                                                                                                                                                                                                                                              |                  |                                    |   |  |   |  |     |  |    |  |    |  |    |  |    |  |    |  |                                                                                                                                                                                                                                                                                                   |          |        |    |  |    |  |    |  |    |  |    |  |    |  |     |  |    |  |                                                                                                                                                                                                                                                                                                       |          |        |    |  |    |  |    |  |     |  |     |  |     |  |     |  |     |  |
| 4+                                                                                                                                                                                                                                                                                              |                  |                                    |   |  |   |  |     |  |    |  |    |  |    |  |    |  |    |  |                                                                                                                                                                                                                                                                                                   |          |        |    |  |    |  |    |  |    |  |    |  |    |  |     |  |    |  |                                                                                                                                                                                                                                                                                                       |          |        |    |  |    |  |    |  |     |  |     |  |     |  |     |  |     |  |
| 8+                                                                                                                                                                                                                                                                                              |                  |                                    |   |  |   |  |     |  |    |  |    |  |    |  |    |  |    |  |                                                                                                                                                                                                                                                                                                   |          |        |    |  |    |  |    |  |    |  |    |  |    |  |     |  |    |  |                                                                                                                                                                                                                                                                                                       |          |        |    |  |    |  |    |  |     |  |     |  |     |  |     |  |     |  |
| 13+                                                                                                                                                                                                                                                                                             |                  |                                    |   |  |   |  |     |  |    |  |    |  |    |  |    |  |    |  |                                                                                                                                                                                                                                                                                                   |          |        |    |  |    |  |    |  |    |  |    |  |    |  |     |  |    |  |                                                                                                                                                                                                                                                                                                       |          |        |    |  |    |  |    |  |     |  |     |  |     |  |     |  |     |  |
| 14+                                                                                                                                                                                                                                                                                             |                  |                                    |   |  |   |  |     |  |    |  |    |  |    |  |    |  |    |  |                                                                                                                                                                                                                                                                                                   |          |        |    |  |    |  |    |  |    |  |    |  |    |  |     |  |    |  |                                                                                                                                                                                                                                                                                                       |          |        |    |  |    |  |    |  |     |  |     |  |     |  |     |  |     |  |
| 16+                                                                                                                                                                                                                                                                                             |                  |                                    |   |  |   |  |     |  |    |  |    |  |    |  |    |  |    |  |                                                                                                                                                                                                                                                                                                   |          |        |    |  |    |  |    |  |    |  |    |  |    |  |     |  |    |  |                                                                                                                                                                                                                                                                                                       |          |        |    |  |    |  |    |  |     |  |     |  |     |  |     |  |     |  |
| 18+                                                                                                                                                                                                                                                                                             |                  |                                    |   |  |   |  |     |  |    |  |    |  |    |  |    |  |    |  |                                                                                                                                                                                                                                                                                                   |          |        |    |  |    |  |    |  |    |  |    |  |    |  |     |  |    |  |                                                                                                                                                                                                                                                                                                       |          |        |    |  |    |  |    |  |     |  |     |  |     |  |     |  |     |  |
| 22+                                                                                                                                                                                                                                                                                             |                  |                                    |   |  |   |  |     |  |    |  |    |  |    |  |    |  |    |  |                                                                                                                                                                                                                                                                                                   |          |        |    |  |    |  |    |  |    |  |    |  |    |  |     |  |    |  |                                                                                                                                                                                                                                                                                                       |          |        |    |  |    |  |    |  |     |  |     |  |     |  |     |  |     |  |
| Total:                                                                                                                                                                                                                                                                                          | Total:           | Total:                             |   |  |   |  |     |  |    |  |    |  |    |  |    |  |    |  |                                                                                                                                                                                                                                                                                                   |          |        |    |  |    |  |    |  |    |  |    |  |    |  |     |  |    |  |                                                                                                                                                                                                                                                                                                       |          |        |    |  |    |  |    |  |     |  |     |  |     |  |     |  |     |  |
